# Supplementary material for: Impending radiographic erosive progression over the following year in a cohort of consecutive patients with inflammatory polyarthritis: prediction by serum biomarkers
Source: PubMed Central journal article supplement — RMD Open. 2020 May 1;6(1):e001191. doi: 10.1136/rmdopen-2020-001191 (PMC7299510; doi:10.1136/rmdopen-2020-001191), 2020-05-01
Supplement: rmdopen-2020-001191s001.pdf [file rmdopen-2020-001191s001.pdf]

**Supplementary Table 1. Stability over up to 5 years of 14-3-3 $\eta$ , RF, ACPA and CRP status (positive or negative)**

| At baseline | Over follow up duration*  | 14-3-3 $\eta$<br>$\geq 0.50$ ng/ml<br>(High-14-3-3 $\eta$ ) | ACPA positive<br>(ACPA) | RF positive<br>(RF) | CRP<br>>8.0 mg/L<br>(High-CRP) |
|-------------|---------------------------|-------------------------------------------------------------|-------------------------|---------------------|--------------------------------|
|             |                           | n (%)                                                       | n (%)                   | n (%)               | n (%)                          |
|             | <b>Total</b>              | 219                                                         | 252                     | 273                 | 412                            |
| Positive    | Remained positive         | 85 (38.8)                                                   | 218 (86.5)              | 146 (53.5)          | 56 (13.6)                      |
|             | Became stably negative**  | 73 (33.3)                                                   | 23 (9.1)                | 67 (24.5)           | 271 (65.8)                     |
|             | Became negative only once | 48 (21.9)                                                   | 11 (4.4)                | 56 (20.5)           | 64 (15.5)                      |
|             | Unstable***               | 13 (5.9)                                                    | 0 (0)                   | 4 (1.5)             | 21 (5.1)                       |
|             | <b>Total</b>              | 429                                                         | 449                     | 432                 | 294                            |
| Negative    | Remained negative         | 264 (61.5)                                                  | 419 (93.3)              | 400 (92.6)          | 219 (74.5)                     |
|             | Became stably positive**  | 39 (9.1)                                                    | 16 (3.6)                | 13 (3.0)            | 18 (6.1)                       |
|             | Became positive only once | 108 (25.2)                                                  | 14 (3.1)                | 17 (3.9)            | 53 (18.0)                      |
|             | Unstable***               | 18 (4.2)                                                    | 0 (0)                   | 2 (0.5)             | 4 (1.4)                        |

\* The maximal number of evaluable visits per patient was 2 in 73, 70, 70 and 59 patients; 3 in 83, 247, 81, and 73; 4 in 131, 215, 146, and 128; and 5 in 361, 169, 408 and 446 patients for 14-3-3 $\eta$ , ACPA, RF and CRP, respectively.

\*\* Changed status (positive to negative or negative to positive) and remained so for at least 2 consecutive visits

\*\*\* Unstable means that status (positive or negative) was variable from one visit to the other.
