# Supplementary material for: Impending radiographic erosive progression over the following year in a cohort of consecutive patients with inflammatory polyarthritis: prediction by serum biomarkers
Source: PubMed Central journal article supplement — RMD Open. 2020 May 1;6(1):e001191. doi: 10.1136/rmdopen-2020-001191 (PMC7299510; doi:10.1136/rmdopen-2020-001191), 2020-05-01
Supplement: rmdopen-2020-001191s002.pdf [file rmdopen-2020-001191s002.pdf]

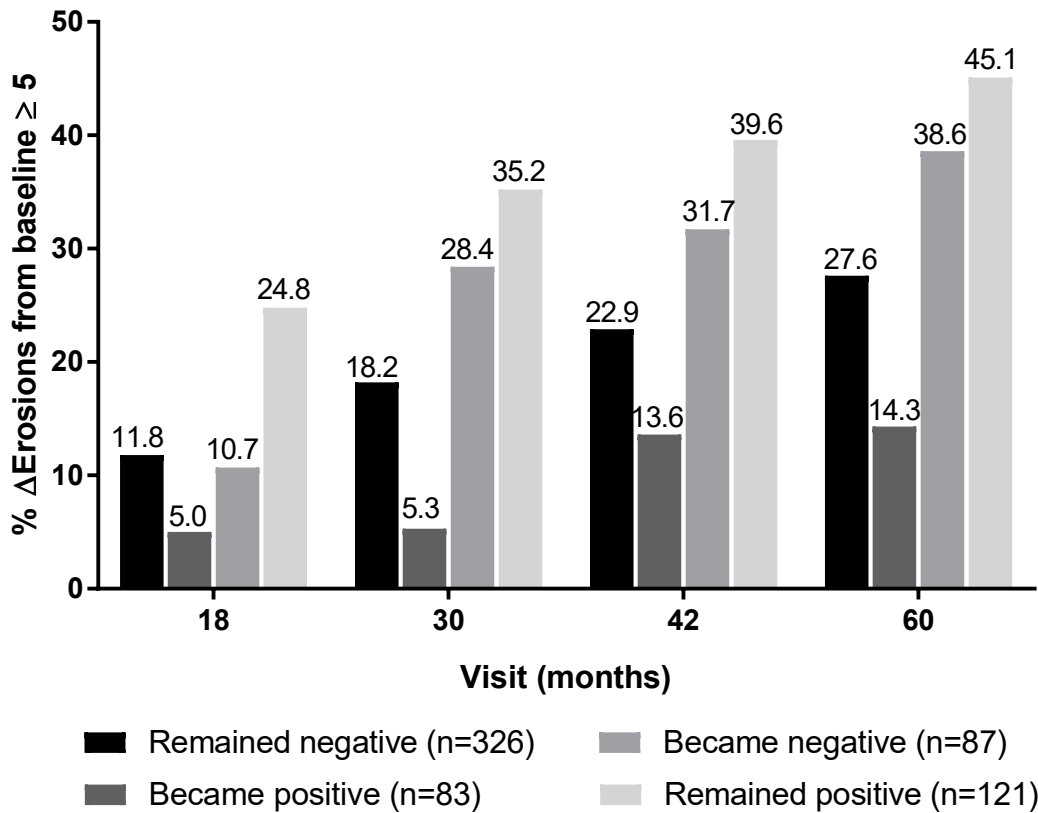

**Supplementary Figure. Radiographic progression to reach erosive status (at least 5 units in the Sharp/van der Heijde erosion score) over the length of follow up according to stability of 14-3-3 $\eta$  between baseline and 18 months.** Patients initially High-14-3-3 $\eta$  positive had significantly more progression of erosive damage. However, patients who remained positive at 18 months had more REP (RR= 2.77 (1.46-5.26), p=0.0019) than patients who became negative or those who remained negative (RR=2.27 (1.51-3.41), p<0.0001). Patients who remained negative had more REP (RR= 2.52 (1.11-5.7), p=0.0269) than patients who became positive (usually only transiently) at 18 months.
