# Supplementary material for: Impending radiographic erosive progression over the following year in a cohort of consecutive patients with inflammatory polyarthritis: prediction by serum biomarkers
Source: PubMed Central journal article supplement — RMD Open. 2020 May 1;6(1):e001191. doi: 10.1136/rmdopen-2020-001191 (PMC7299510; doi:10.1136/rmdopen-2020-001191), 2020-05-01
Supplement: rmdopen-2020-001191s003.pdf [file rmdopen-2020-001191s003.pdf]

**Supplementary Table 2. Impact of positive status for 14-3-3 $\eta$ , Rheumatoid Factor (RF), Anti-Cyclic Peptides Antibodies (ACPA) and C-Reactive Protein (CRP) at each visit on prediction of Erosive Progression (EP) at the subsequent annual visit**

| Variables at previous visit          | Visits<br>Total | Erosive Progression (EP; increase in Erosions<br>$\geq 1$ between 2 visits) |                  |         |
|--------------------------------------|-----------------|-----------------------------------------------------------------------------|------------------|---------|
|                                      |                 | n (%)                                                                       | RR (95% CI)      | p-value |
| <b>Individual variables</b>          |                 |                                                                             |                  |         |
| 14-3-3 $\eta$                        | 695             | 321 (46.2)                                                                  | 1.11 (0.99-1.25) | 0.0669  |
| ACPA positive                        | 727             | 352 (48.4)                                                                  | 1.31 (1.15-1.48) | <.0001  |
| RF positive                          | 762             | 385 (50.5)                                                                  | 1.36 (1.22-1.53) | <.0001  |
| CRP                                  | 721             | 372 (51.6)                                                                  | 1.36 (1.24-1.50) | <.0001  |
| <b>RF, ACPA</b>                      | (n=1938)        |                                                                             |                  |         |
| Both negative                        | 1059            | 370 (34.9)                                                                  | 1                |         |
| One positive                         | 353             | 161 (45.6)                                                                  | 1.34 (1.15-1.56) | 0.0002  |
| Both positive                        | 526             | 266 (50.6)                                                                  | 1.46 (1.27-1.68) | <.0001  |
| <b>RF, CRP</b>                       | (n=2155)        |                                                                             |                  |         |
| Both negative                        | 957             | 313 (32.7)                                                                  | 1                |         |
| One positive                         | 917             | 408 (44.5)                                                                  | 1.33 (1.18-1.49) | <.0001  |
| Both positive                        | 281             | 173 (61.6)                                                                  | 1.78 (1.55-2.04) | <.0001  |
| <b>ACPA, CRP</b>                     | (n=1945)        |                                                                             |                  |         |
| Both negative                        | 822             | 271 (33.0)                                                                  | 1                |         |
| One positive                         | 864             | 371 (42.9)                                                                  | 1.29 (1.14-1.45) | <.0001  |
| Both positive                        | 259             | 158 (61.0)                                                                  | 1.74 (1.50-2.02) | <.0001  |
| <b>14-3-3<math>\eta</math>, RF</b>   | (n=2083)        |                                                                             |                  |         |
| Both negative                        | 1070            | 412 (38.5)                                                                  | 1                |         |
| One positive                         | 593             | 236 (39.8)                                                                  | 1.06 (0.93-1.21) | 0.415   |
| Both positive                        | 420             | 232 (55.2)                                                                  | 1.40 (1.23-1.61) | <.0001  |
| <b>14-3-3<math>\eta</math>, ACPA</b> | (n=1881)        |                                                                             |                  |         |
| Both negative                        | 903             | 349 (38.6)                                                                  | 1                |         |
| One positive                         | 627             | 257 (41.0)                                                                  | 1.08 (0.95-1.23) | 0.2488  |

|                                               |          |            |                  |        |
|-----------------------------------------------|----------|------------|------------------|--------|
| Both positive                                 | 351      | 184 (52.4) | 1.30 (1.11-1.51) | 0.0009 |
| <b>14-3-3<math>\eta</math>, CRP</b>           | (n=2090) |            |                  |        |
| Both negative                                 | 935      | 347 (37.1) | 1                |        |
| One positive                                  | 914      | 389 (42.6) | 1.11 (1.00-1.24) | 0.0538 |
| Both positive                                 | 241      | 148 (61.4) | 1.57 (1.36-1.8)  | <.0001 |
| <b>14-3-3<math>\eta</math>, RF, CRP</b>       | (n=2083) |            |                  |        |
| All negative                                  | 721      | 255 (35.4) | 1                |        |
| One positive                                  | 752      | 301 (40.0) | 1.14 (1.00-1.30) | 0.0515 |
| Two positive                                  | 449      | 211 (47.0) | 1.31 (1.13-1.52) | 0.0004 |
| All positive                                  | 161      | 113 (70.2) | 1.91 (1.64-2.23) | <.0001 |
| <b>14-3-3<math>\eta</math>, ACPA, CRP</b>     | (n=1880) |            |                  |        |
| All negative                                  | 593      | 211 (35.6) | 1                |        |
| One positive                                  | 745      | 296 (39.7) | 1.12 (0.98-1.29) | 0.0883 |
| Two positive                                  | 401      | 189 (47.1) | 1.30 (1.12-1.52) | 0.0008 |
| All positive                                  | 141      | 94 (66.7)  | 1.75 (1.46-2.10) | <.0001 |
| <b>14-3-3<math>\eta</math>, RF, ACPA</b>      | (n=1874) |            |                  |        |
| All negative                                  | 822      | 310 (37.7) | 1                |        |
| One positive                                  | 411      | 154 (37.5) | 1.06 (0.91-1.24) | 0.4604 |
| Two positive                                  | 347      | 161 (46.4) | 1.23 (1.05-1.45) | 0.0095 |
| All positive                                  | 294      | 162 (55.1) | 1.45 (1.24-1.70) | <.0001 |
| <b>RF, ACPA, CRP</b>                          | (n=1938) |            |                  |        |
| All negative                                  | 713      | 220 (30.9) | 1                |        |
| One positive                                  | 597      | 259 (43.4) | 1.39 (1.21-1.60) | <.0001 |
| Two positive                                  | 422      | 186 (44.1) | 1.44 (1.23-1.69) | <.0001 |
| All positive                                  | 206      | 132 (64.1) | 1.99 (1.69-2.34) | <.0001 |
| <b>14-3-3<math>\eta</math>, RF, ACPA, CRP</b> | (n=1874) |            |                  |        |
| All negative                                  | 537      | 184 (34.3) | 1                |        |
| One positive                                  | 583      | 230 (39.5) | 1.17 (1.01-1.36) | 0.0375 |
| Two positive                                  | 339      | 143 (42.2) | 1.27 (1.07-1.50) | 0.0058 |

|                |     |            |                  |        |
|----------------|-----|------------|------------------|--------|
| Three positive | 293 | 144 (49.1) | 1.43 (1.19-1.71) | 0.0001 |
| All positive   | 122 | 86 (70.5)  | 1.98 (1.66-2.37) | <.0001 |

---
